# Supplementary material for: In Vitro and In Vivo Analysis of Ochratoxin A-Derived Glucuronides and Mercapturic Acids as Biomarkers of Exposure
Source: Toxins (Basel). 2021 Aug 23;13(8):587. doi: 10.3390/toxins13080587 (PMC8402547; doi:10.3390/toxins13080587)
Supplement: Supplementary file 1 [file toxins-13-00587-s001.zip › toxins-1336459-supplementary.pdf]

# Supplementary Materials: In Vitro and In Vivo Analysis of Ochratoxin A-Derived Glucuronides and Mercapturic Acids as Biomarkers of Exposure

Raphael Dekant, Michael Langer, Maria Lupp, Cynthia Adaku Chilaka and Angela Mally

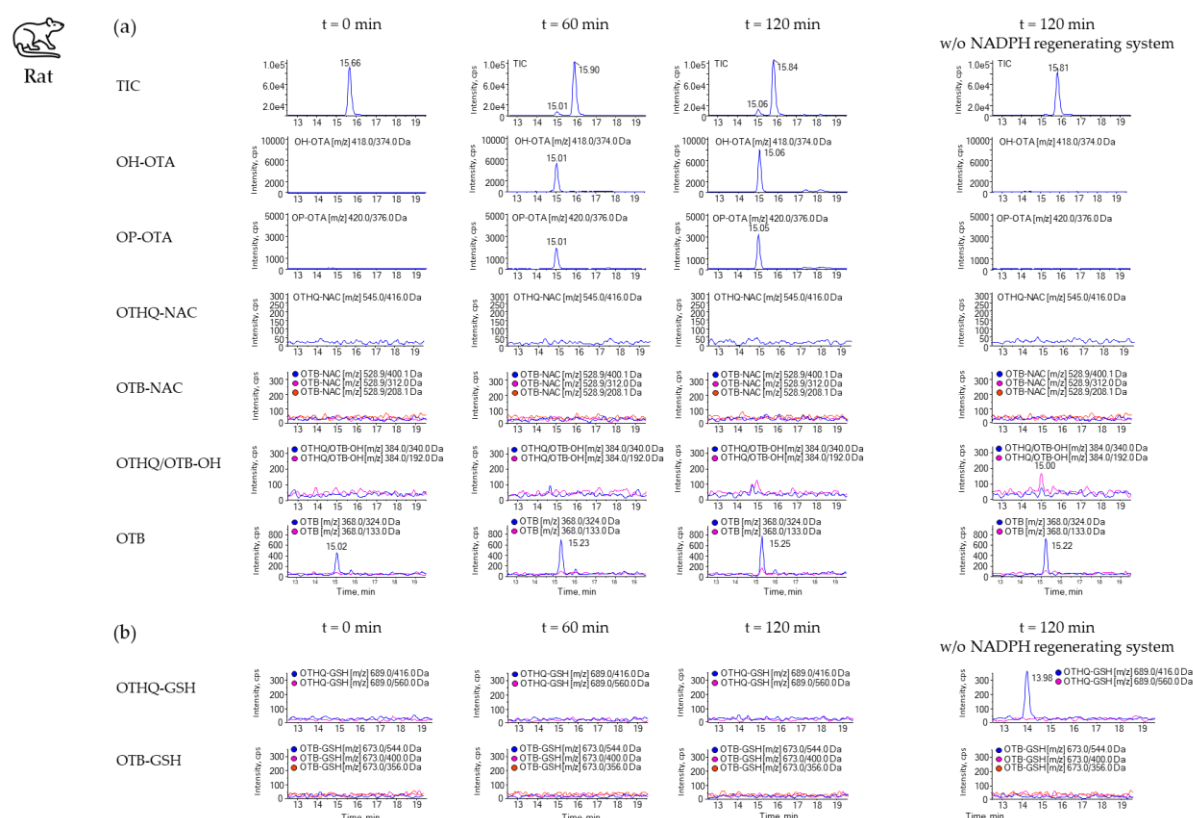

**Figure S1.** LC-MS chromatograms showing analysis of time-dependent formation of potential OTA metabolites in in vitro incubations of OTA with rat liver S9 in the presence of *N*-acetyl-cysteine (a) or GSH (b), including control experiments carried out in the absence of an NADPH regenerating system.

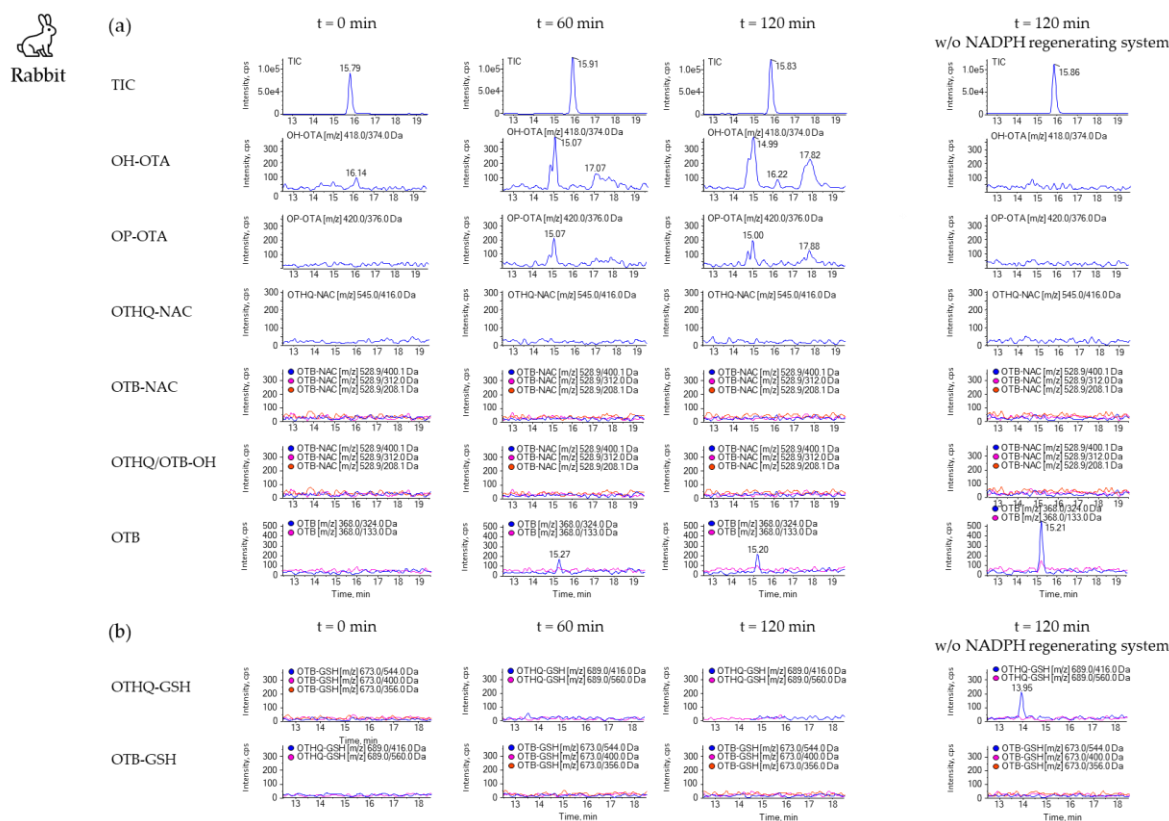

**Figure S2.** LC-MS chromatograms showing analysis of time-dependent formation of potential OTA metabolites in *in vitro* incubations of OTA with rabbit liver S9 in the presence of *N*-acetyl-cysteine (a) or GSH (b), including control experiments carried out in the absence of an NADPH regenerating system.

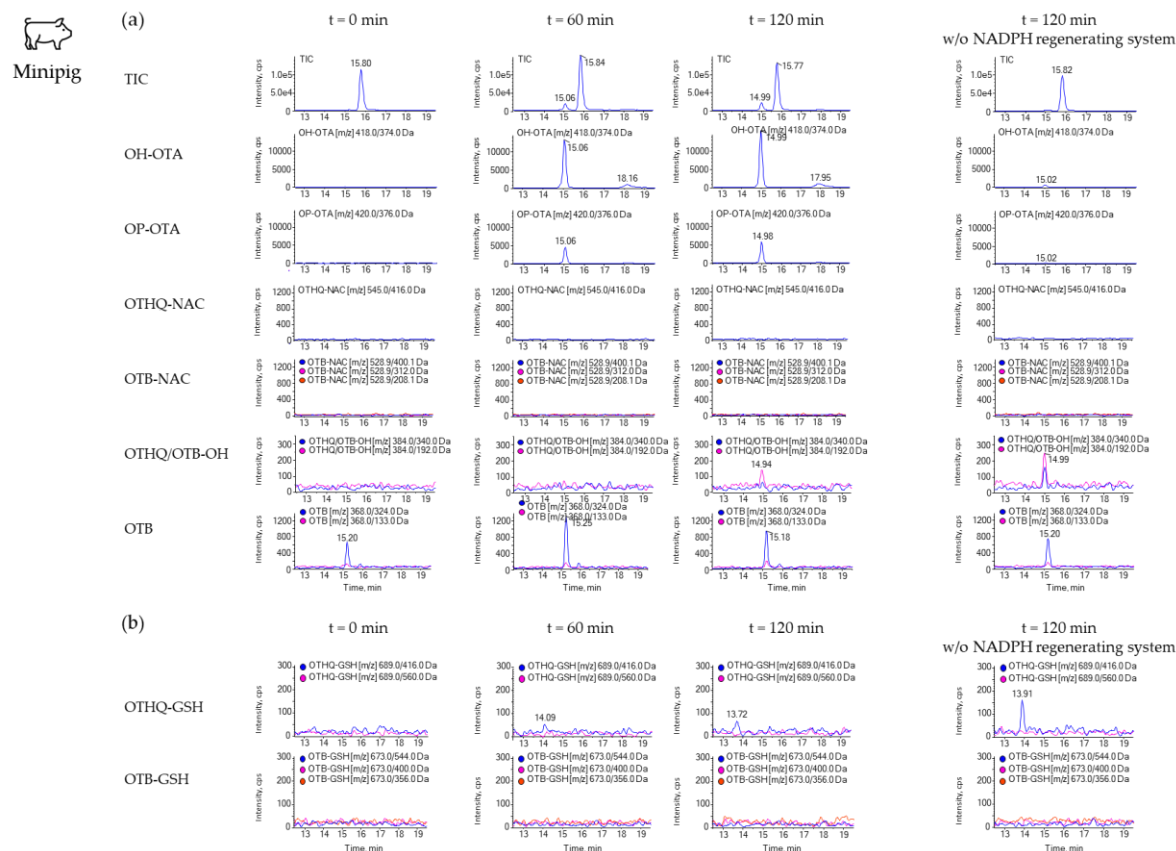

**Figure S3.** LC-MS chromatograms showing analysis of time-dependent formation of potential OTA metabolites in vitro incubations of OTA with minipig liver S9 in the presence of N-acetyl-cysteine (a) or GSH (b), including control experiments carried out in the absence of an NADPH regenerating system.

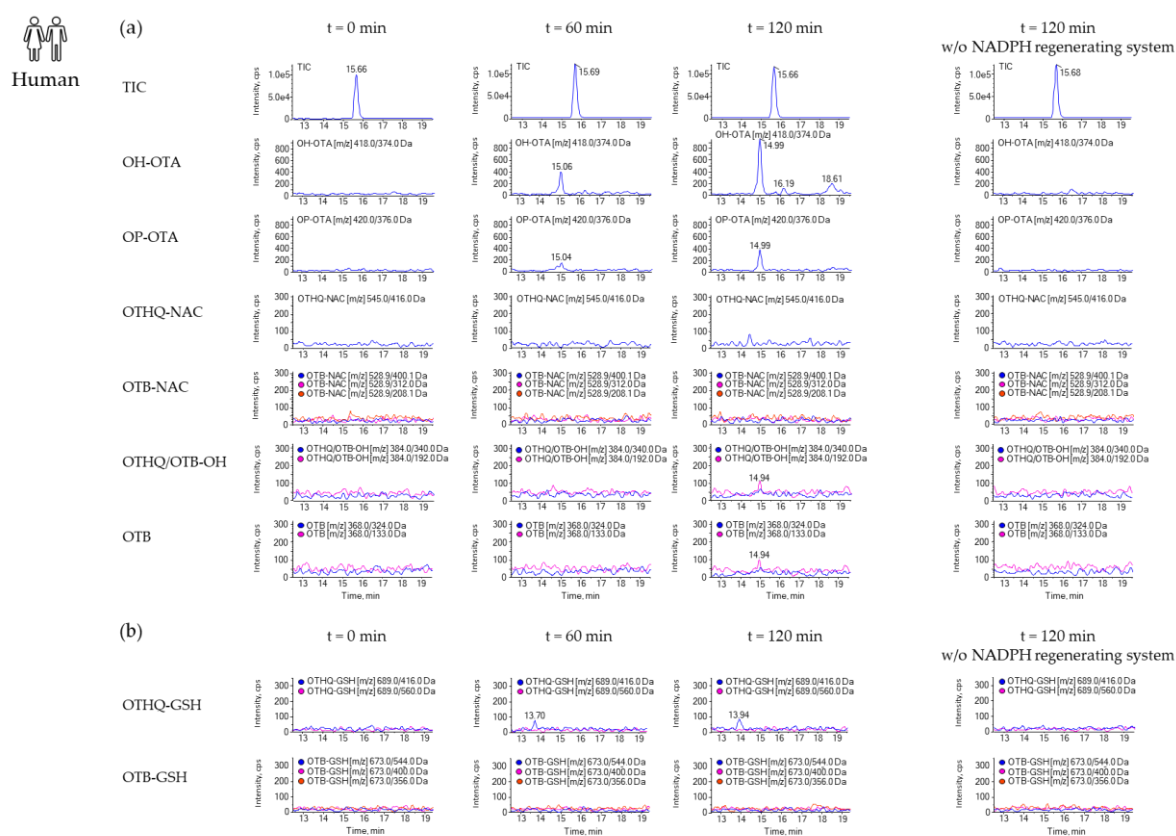

**Figure S4.** LC-MS chromatograms showing analysis of time-dependent formation of potential OTA metabolites in vitro incubations of OTA with human liver S9 in the presence of *N*-acetyl-cysteine (a) or GSH (b), including control experiments carried out in the absence of an NADPH regenerating system.
